# Supplementary material for: Phenotypic and Genotypic Characterization of Macrolide, Lincosamide and Streptogramin B Resistance among Clinical Methicillin-Resistant Staphylococcus aureus Isolates in Chile
Source: MDPI journal article supplement (doi:10.3390/antibiotics11081000), 2022-07-25
Supplement: s1 [file s1]

## Supplementary File

**Table S1.** Primers used in this study.

| Gene target                          | Primer sequence (5'-3')                                                              | Product size (bp) |
|--------------------------------------|--------------------------------------------------------------------------------------|-------------------|
| <i>ermA</i>                          | F-TATCTTATCGTTGAGAAGGGAT<br>R-CTACACTTGGCTTAGGATGAAA                                 | 139               |
| <i>ermB</i>                          | F- GAAAAGGTACTCAACCAAATA<br>R- AGTAACGGTACTTAAATTGTTTAC                              | 163               |
| <i>ermC</i>                          | F-CTTGTTGATCACGATAATTTCC<br>R-ATCTTTTAGCAAACCCGTATTC                                 | 190               |
| <i>msrA</i>                          | F-TCCAATCATAGCACAAAATC<br>R-AATTCCCTCTATTTGGTGGT                                     | 163               |
| <i>pvl</i>                           | F-ATCATAGGTAAAATGTCTGACATGATCCA<br>R-GCATCAASTGTATTGGATAGCAAAAGC                     | 433               |
| <i>mecA</i>                          | F-GTGAAGATATACCAAGTGATT<br>R-ATGCGCTATAGATTGAAAGGAT                                  | 147               |
| SCC <i>mecI</i>                      | F-GCTTTAAAGAGTGTCTGTTACAGG<br>R-GTTCTCTCATAGTATGACGTCC                               | 613               |
| SCC <i>mecII</i>                     | F-CGTTGAAGATGATGAAGCG<br>R-CGAAATCAATGGTTAATGGACC                                    | 398               |
| SCC <i>mecII</i> , VIII              | F-TAGCTTATGGTGCTTATGCG<br>R-GTGCATGATTTTATTTGTGGC                                    | 128               |
| Mercury elemnt of SCC- <i>mecIII</i> | F-CCATATTGTGTACGATGCG<br>R-CCTTAGTTGTCTGTAACAGATCG                                   | 280               |
| SCC <i>mec III</i> and IIIA          | F-TTCTCATTGATGCTGAAGCC<br>R-GTGTAATTTCTTTTGAAAGATATGG                                | 257               |
| SCC <i>mec IVa</i>                   | F-GCCTTATTCGAAGAAACCG<br>R-CTACTCTTCTGAAAAGCGTCG                                     | 776               |
| SCC <i>mec IVb</i> , IVF             | F-TCTGGAATTACTTCAGCTGC<br>R-AAACAATATTGCTCTCCCTC                                     | 493               |
| SCC <i>mec IVc</i> , IVE             | F-CCTGAATCTAAAGAGATACACCG<br>R-GGTTATTTTCATAGTGAATCGC                                | 200               |
| SCC <i>mec IVd</i>                   | F-CTCAAAATACGGACCCCAATACA<br>R-TGCTCCAGTAATTGCTAAAG                                  | 881               |
| SCC <i>mec IVE</i> , IVF             | F-CAGATTCATCATTTCAAAGGC<br>R-AACAACCTATTAGATAATTTCCG                                 | 175               |
| SCC <i>mec V</i>                     | F-GAACATTGTTACTTAAATGAGCG<br>R-TGAAAGTTGTACCCTTGACACC                                | 325               |
| SCC <i>mec VI</i> , VIII             | F-ATCGCTCATTATGGATACYGC<br>R5-CCATTTTTTGTATAACCTGAACG<br>R6- CTATTTTTTTTATAGCCTGAACG | 106               |
